# Supplementary material for: Stable isotope signatures of soil nitrogen on an environmental-geomorphicgradient within the Congo Basin
Source: Copernicus journal article supplement (doi:10.5194/soil-2020-70), 2020-11-10
Supplement: Supplementary file 1 [file soil-2020-70-supplement.pdf]

## Supplement

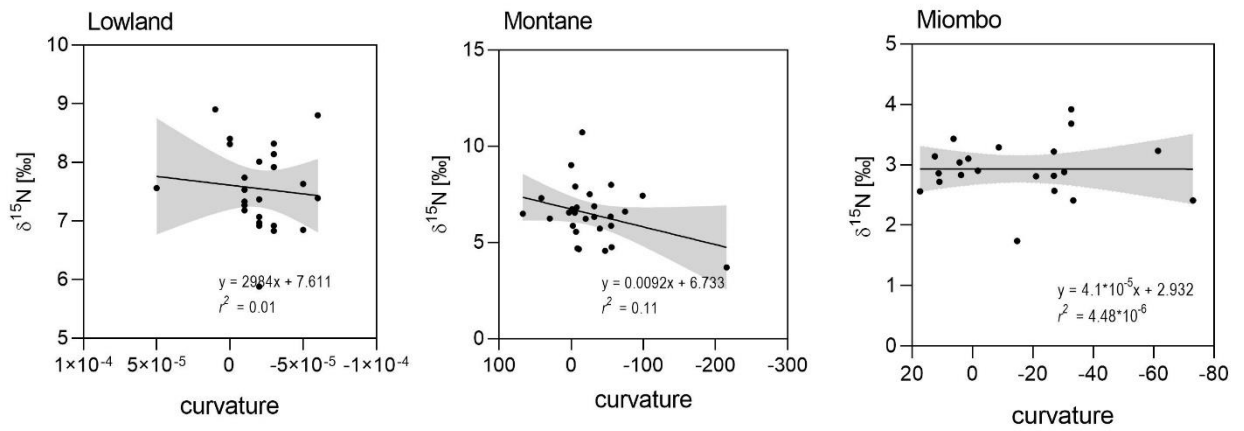

**Figure S1:**  $\delta^{15}\text{N}$  in topsoil (0 – 20 cm) plotted against the curvature of the sampling spot. Positive curvature values represent concave landforms, while negative values represent convex landforms.

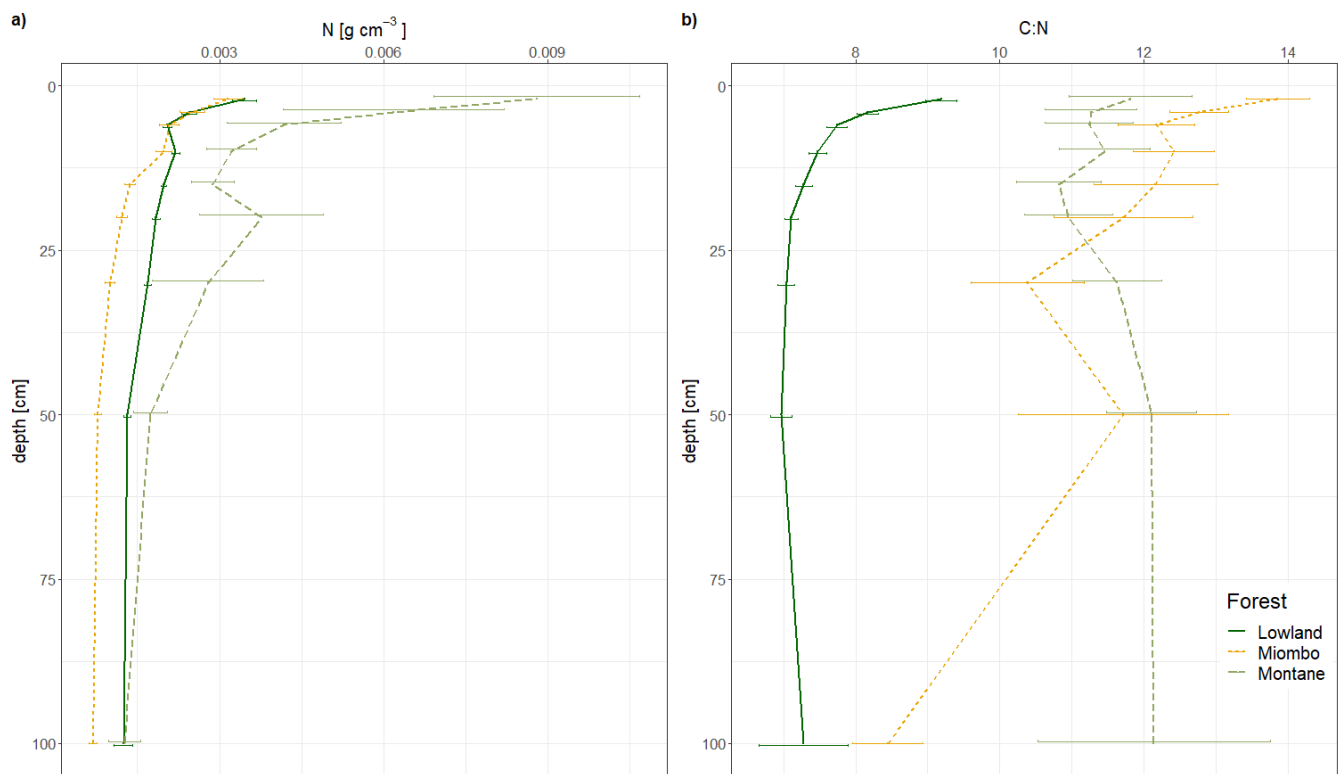

**Figure S2:** a) Profiles of average bulk N values in  $\text{g cm}^{-3}$  for the three different forest sites. b) Profiles of average C:N ratios for the different forest sites. Error bar indicate standard error.
